# Supplementary material
Source: PubMed Central journal article supplement (PMC6068788)
Supplement: supplementary_table.pdf [file supplementary_table.pdf]

Supplementary Table S1: The clinical and pathological data of patients with AIH and hepatic cyst whose liver tissues were used to perform IF.

| Patient number           | 1     | 2     | 3     | 4     | 5     | 6      | 7     | 10           | 13           | 14           | 15           |
|--------------------------|-------|-------|-------|-------|-------|--------|-------|--------------|--------------|--------------|--------------|
| Diagnosis                | AIH   | AIH   | AIH   | AIH   | AIH   | AIH    | AIH   | hepatic cyst | hepatic cyst | hepatic cyst | hepatic cyst |
| Sex                      | F     | F     | F     | F     | F     | F      | F     | F            | F            | F            | M            |
| Age (yr)                 | 74    | 38    | 51    | 58    | 59    | 34     | 75    | 55           | 63           | 53           | 48           |
| AST (U/L)                | 75    | 952   | 138   | 506   | 880   | 316    | 777   | 15           | 11           | 20           | 14           |
| ALT (U/L)                | 140   | 708   | 85    | 324   | 651   | 232    | 108   | 25           | 15           | 18           | 22           |
| ALP (U/L)                | 145   | 153   | 96    | 71    | 146   | 74     | 77    | 82           | 84           | 45           | 70           |
| GGT (U/L)                | 149   | 144   | 32    | 190   | 416   | 66     | 117   | 38           | 29           | 28           | 35           |
| IgG (g/L)                | 1630  | 1790  | 1300  | 1610  | 1570  | 1736   | 1910  | /            | /            | /            | /            |
| IgM (g/L)                | 180   | 76    | 98.2  | 203   | 87.1  | 230    | 220   | /            | /            | /            | /            |
| ANA titer                | 1:200 | 1:100 | 1:100 | 1:400 | 1:800 | 1:1600 | 1:400 | /            | /            | /            | /            |
| AMA titer                | -     | -     | -     | -     | -     | -      | -     | /            | /            | /            | /            |
| Cirrhosis                | N     | N     | N     | N     | N     | N      | N     | N            | N            | N            | N            |
| Histological finding     |       |       |       |       |       |        |       |              |              |              |              |
| Interface hepatitis      | Y     | N     | Y     | Y     | N     | Y      | Y     | N            | N            | N            | N            |
| Lymphocytic infiltration | Y     | Y     | Y     | Y     | Y     | Y      | Y     | N            | N            | N            | N            |
| Rosetting                | Y     | N     | Y     | N     | N     | N      | N     | N            | N            | N            | N            |

-, negative; /, not available; N, no; Y, yes.



-, negative; /, not available; N, no; Y, yes.
